# Supplementary material for: Fabrication of a direct Z-scheme heterojunction of UiO-66-NH2 and tubular g-C3N4 for the stable photocatalytic reduction of CO2 to CO and CH4
Source: Royal Society of Chemistry journal article supplement (doi:10.1039/d4cy00790e), 2024-01-01
Supplement: d4cy00790e1.pdf [file d4cy00790e1.pdf]

## Supporting information

### Fabrication of the direct Z-scheme heterojunction of UiO-66-NH<sub>2</sub> and tubular g-C<sub>3</sub>N<sub>4</sub> for stable photocatalytic reduction of CO<sub>2</sub> to CO and CH<sub>4</sub>

Hongyang Liu, Yang Yang, Chaojun Guo, Yonghua Zhou\*

*College of Chemistry and Chemical Engineering, Central South University, Changsha*

*410083, China*

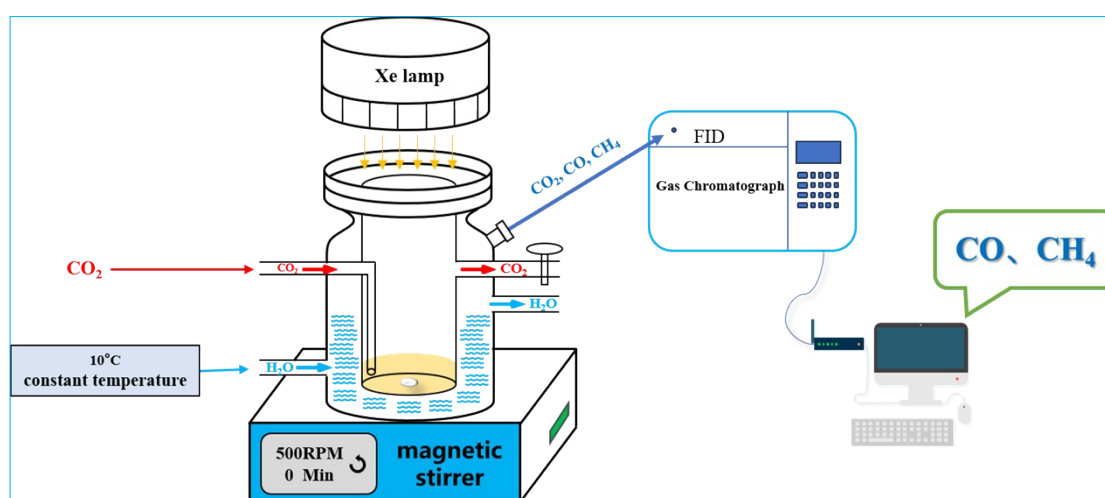

**Schematic S1.** The schematic of the photocatalytic reactor and the CO<sub>2</sub> reduction experiment conducted.

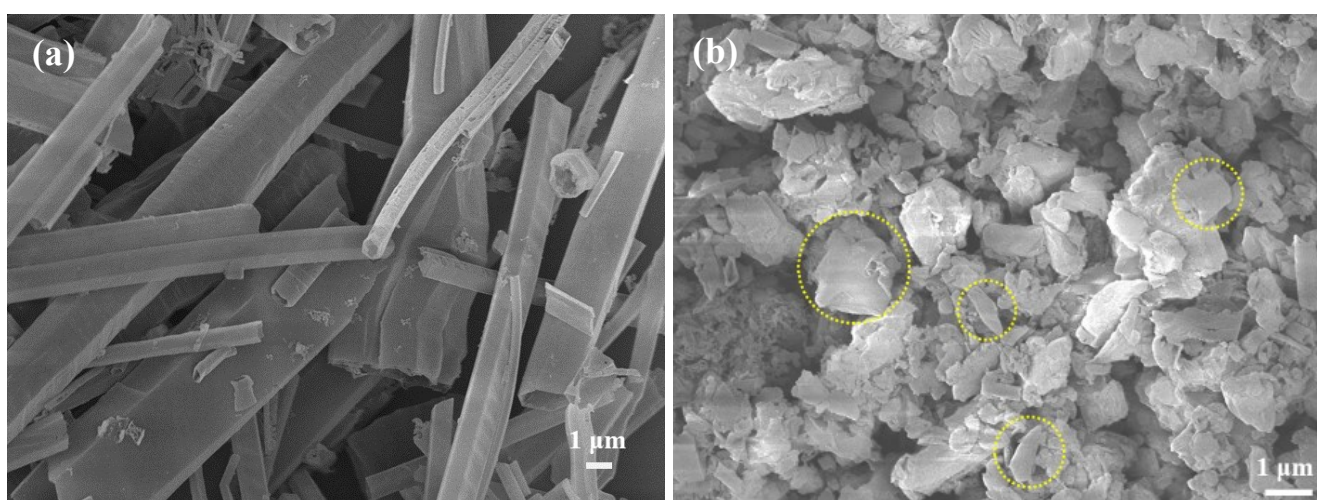

**Fig. S1.** SEM images of TCN (a) and SCN (b).

**Table S1.** XPS elemental content of UNH and T/U-0.65.

|          | Atomic% |       |       |      |
|----------|---------|-------|-------|------|
|          | C       | N     | O     | Zr   |
| UNH      | 53.98   | 5.36  | 33.93 | 6.74 |
| T/U-0.65 | 51.51   | 31.37 | 15.6  | 1.52 |

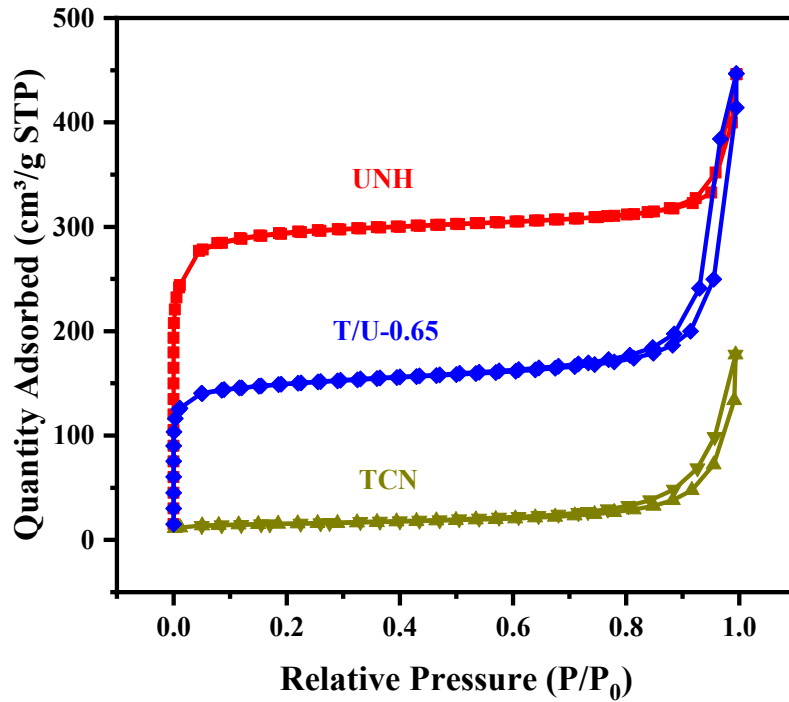**Fig. S2.** N<sub>2</sub> adsorption-desorption isotherms of TCN, pure UNH and T/U-0.65.**Table S2.** S<sub>BET</sub> and pore volume data for TCN, pure UNH and T/U-0.65.

|          | S <sub>BET</sub> (cm <sup>2</sup> /g) | V <sub>total</sub> (cm <sup>3</sup> /g) | V <sub>mic</sub> (cm <sup>3</sup> /g) | V <sub>mes</sub> (cm <sup>3</sup> /g) |
|----------|---------------------------------------|-----------------------------------------|---------------------------------------|---------------------------------------|
| TCN      | 58                                    | 0.27                                    | 0.014                                 | 0.13                                  |
| UNH      | 1172                                  | 0.69                                    | 0.44                                  | 0.25                                  |
| T/U-0.65 | 592                                   | 0.68                                    | 0.20                                  | 0.48                                  |

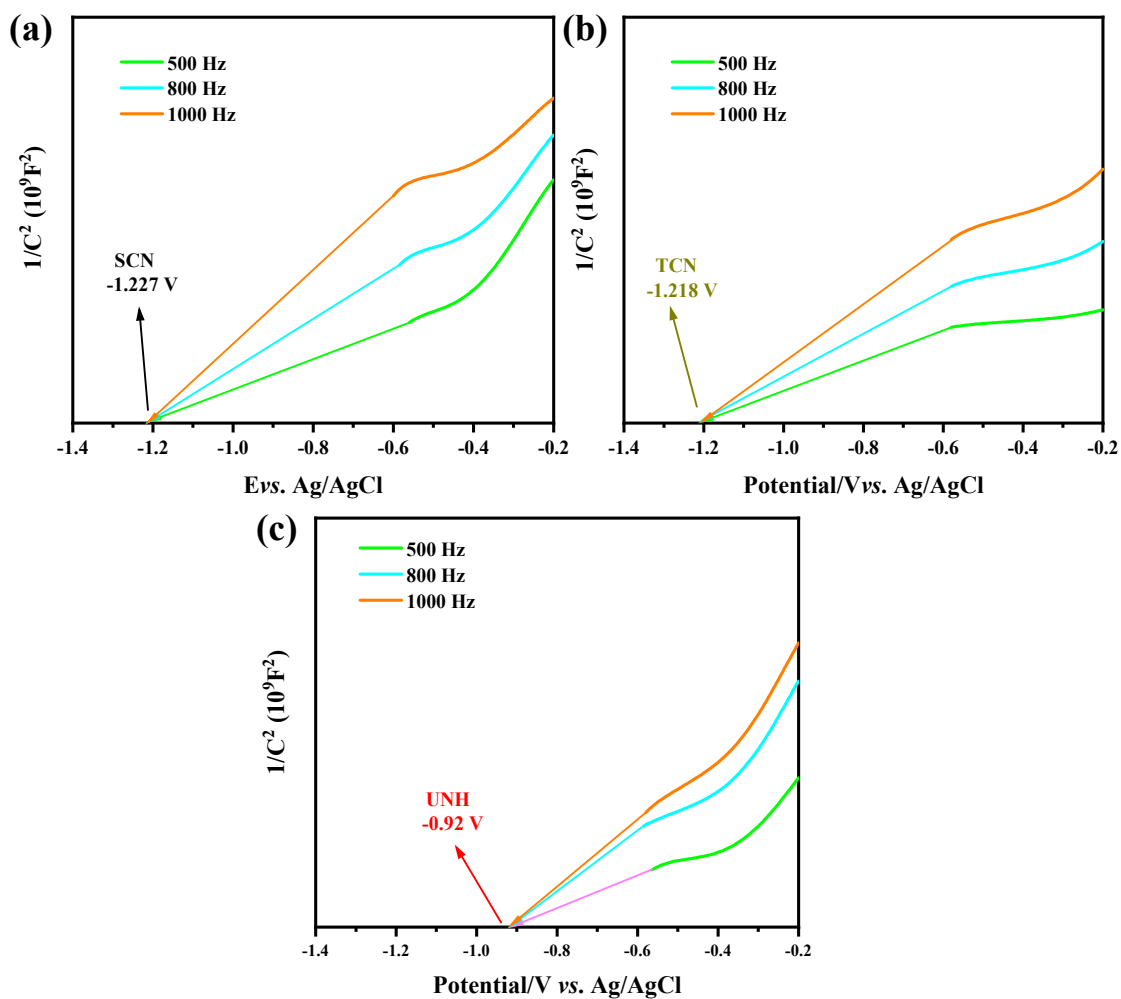

**Fig. S3.** Mott-Schottky curves of SCN (a), TCN (b) and pure UNH (c).

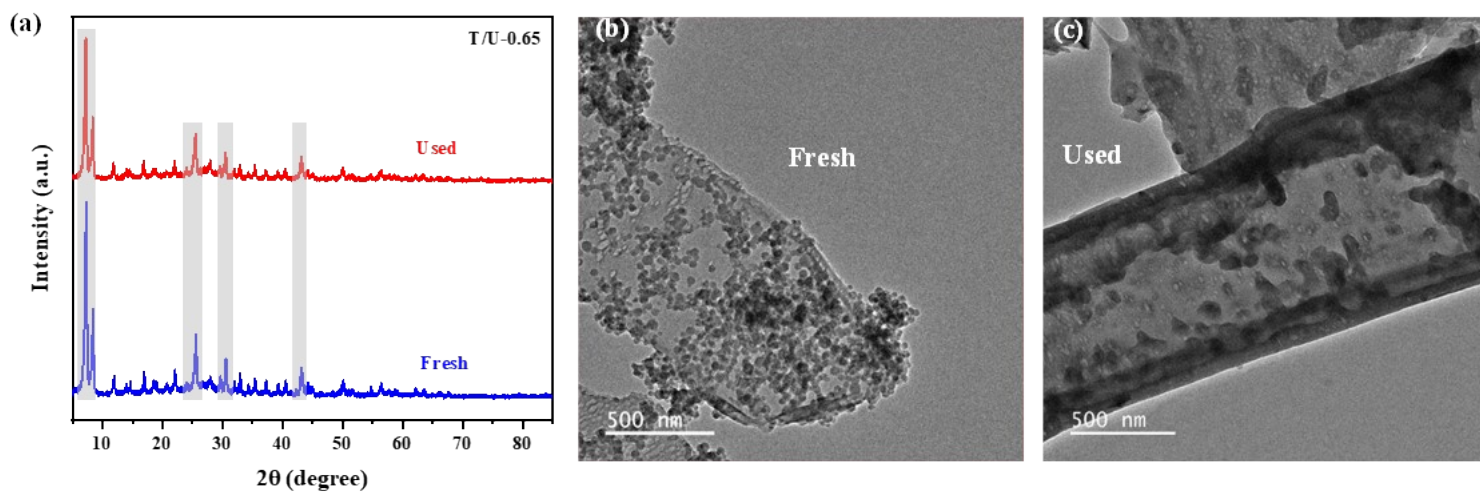

**Fig. S4.** XRD patterns (a) and TEM images (b, c) of fresh and used T/U-0.65 catalyst.

**Table S3.** Comparison of CO<sub>2</sub> photoreduction performance over some reported catalysts and this work.

| Catalysts                                             | CO and CH <sub>4</sub> yields<br>( $\mu\text{mol g}^{-1} \text{h}^{-1}$ ) | S <sub>CH<sub>4</sub></sub> (%) | Reaction<br>time(h) | Reducing<br>agent         | References |
|-------------------------------------------------------|---------------------------------------------------------------------------|---------------------------------|---------------------|---------------------------|------------|
| UiO-66-NH <sub>2</sub> /Cu <sub>2</sub> O/Cu-<br>0.39 | CO : 4.54                                                                 | 0                               | 12                  | H <sub>2</sub> O          | 1          |
| f-MoS <sub>2</sub> @UiO-66-NH <sub>2</sub>            | CO : 23.16<br>CH <sub>4</sub> : 27.18                                     | 82.44                           | 25                  | H <sub>2</sub> O,<br>MeCN | 2          |
| 8%NU66/CIS                                            | CO : 11.24<br>CH <sub>4</sub> : 2.92                                      | 51                              | 18                  | H <sub>2</sub> O          | 3          |
| NH <sub>2</sub> -UiO-66/CuZnS                         | CO : 22.85                                                                | 0                               | 14                  | water<br>vapor            | 4          |
| UNH/Ce (HCOO) <sub>3</sub> -<br>1.80                  | CO : 16.45<br>CH <sub>4</sub> : 29.4                                      | 84                              | 15                  | H <sub>2</sub> O,<br>TEOA | 5          |
| NU/CC-1.6-90                                          | CO : 20.6<br>CH <sub>4</sub> : 14                                         | 73                              | 15                  | H <sub>2</sub> O,<br>TEOA | 6          |
| UiO-66(NH <sub>2</sub> )/HGN                          | CO : 31.6<br>CH <sub>4</sub> : 1.82                                       | 18.7                            | 48                  | H <sub>2</sub> O,<br>TEOA | 7          |
| T/U-0.65                                              | CO : 4.33<br>CH <sub>4</sub> : 14.68                                      | 93.1                            | <b>40</b>           | H <sub>2</sub> O,<br>TEOA | This work  |

### References

- S1 X. X. Zhao, L. L. Sun, X. Jin, M. Y. Xu, S. K. Yin, J. Z. Li, X. Li, D. Shen, Y. Yan and P. W. Huo, *APPL SURF SCI*, 2021, **545**, 148967.
- S2 X. Yang, T. Y. Wang, H. Y. Ma, W. L. Shi, Z. Q. Xia, Q. Yang, P. Zhang, R. Ma, G. Xie and S. P. Chen, *J MATER SCI TECHNOL*, 2024, **182**, 210-219.
- S3 L. F. Hong, R. T. Guo, Z. W. Zhang, Y. Yuan, X. Y. Ji, Z. D. Lin and W. G. Pan, *J CO<sub>2</sub> UTIL*, 2021, **51**, 101650.
- S4 J. T. Sun, Y. C. Guan, G. Z. Yang, S. X. Qiu, H. L. Shao, Y. Wang, G. S. Li and S. N. Xiao, *ACS SUSTAIN CHEM ENG*, 2023, **11**, 14827-14840.
- S5 N. C. Yuan, Y. X. Mei, Y. W. Liu, Y. T. Xie, B. N. Lin and Y. H. Zhou, *J CO<sub>2</sub> UTIL*, 2022, **64**, 102151.
- S6 Y. X. Mei, N. C. Yuan, Y. T. Xie, Y. P. Li, B. N. Lin and Y. H. Zhou, *APPL SURF SCI*, 2022, **597**, 153725.
- S7 Y. N. Wang, L. N. Guo, Y. Q. Zeng, H. W. Guo, S. P. Wan, M. Ou, S. L. Zhang and Q. Zhong, *ACS APPL MATER INTER*, 2019, **11**, 30673-30681.
